# Supplementary material
Source: PubMed Central journal article supplement (PMC4393443)
Supplement: AEM.00270-15_zam999116221so1.pdf [file AEM.00270-15_zam999116221so1.pdf]

Table S1. Typing results of the 59 *fljB*-positive *Salmonella* 1,4,[5],12:i:- isolates collected during the period 2008-2011 in Belgium.

| Isolate          | Year | Antigenic formula <sup>1</sup> | Origin           | Summarized PCR profile                                    | Detailed PCR profile <sup>2</sup> | MLVA profile (STTR9-STTR5-STTR6-STTR10-STTR3) <sup>3</sup> |
|------------------|------|--------------------------------|------------------|-----------------------------------------------------------|-----------------------------------|------------------------------------------------------------|
| VAR-2008/08216/1 | 2008 | 4:i:-                          | Pig              | Amplification of both left and right transposon junctions | TLJ, TRJ                          | 3-13-10-NA-0211                                            |
| VAR-2008/08218/1 |      |                                |                  |                                                           |                                   |                                                            |
| VAR-2008/09601/1 |      |                                |                  |                                                           |                                   |                                                            |
| VAR-2008/10234/1 |      |                                |                  |                                                           |                                   |                                                            |
| VAR-2008/10564/1 |      |                                |                  |                                                           |                                   |                                                            |
| VAR-2008/11470/1 |      |                                |                  |                                                           |                                   |                                                            |
| VAR-2008/16823/1 |      |                                |                  |                                                           |                                   |                                                            |
| IPH-08-4717      |      |                                | Pork             |                                                           |                                   |                                                            |
| VAR-2009/02884/1 | 2009 | 4:i:-                          | Pig              |                                                           |                                   |                                                            |
| VAR-2009/10335/1 |      |                                |                  |                                                           |                                   |                                                            |
| VAR-2010/20086/1 | 2010 | 4:i:-                          | Pig              |                                                           |                                   |                                                            |
| VAR-2011/15490/1 | 2011 | 4:i:-                          | Pig              |                                                           |                                   |                                                            |
| VAR-2011/17532/1 |      |                                |                  |                                                           |                                   |                                                            |
| IPH-08-5428      | 2008 | 4,5:i:-                        | Pork             |                                                           |                                   |                                                            |
| IPH-08-5430      |      | 4:i:-                          |                  |                                                           |                                   |                                                            |
| VAR-2009/01009/1 | 2009 | 4:i:-                          | Pig              |                                                           |                                   |                                                            |
| VAR-2009/01010/1 |      |                                |                  |                                                           |                                   |                                                            |
| VAR-2010/11060/1 | 2010 | 4:i:-                          | Pig              |                                                           |                                   |                                                            |
| IPH-08-1732      | 2008 | 4,5:i:-                        | Meat unspecified |                                                           |                                   |                                                            |
| IPH-10-5565      | 2010 | 4,5:i:-                        | Human            |                                                           |                                   |                                                            |
| VAR-2011/12484/1 | 2011 | 4:i:-                          | Pig              |                                                           |                                   |                                                            |
| IPH-08-5310      | 2008 | 4,5:i:-                        | Pork             |                                                           |                                   |                                                            |
| IPH-08-5311      |      |                                |                  |                                                           |                                   |                                                            |
| IPH-08-5312      |      |                                |                  |                                                           |                                   |                                                            |
| VAR-2011/18250/1 | 2011 | 4:i:-                          | Pig              |                                                           |                                   |                                                            |
| VAR-2010/11079/1 | 2010 | 4,5:i:-                        | Pig              |                                                           |                                   |                                                            |

| Isolate             | Year | Antigenic formula <sup>1</sup> | Origin  | Summarized PCR profile                                            | Detailed PCR profile <sup>2</sup>                                               | MLVA profile (STTR9-STTR5-STTR6-STTR10-STTR3) <sup>3</sup> |                 |
|---------------------|------|--------------------------------|---------|-------------------------------------------------------------------|---------------------------------------------------------------------------------|------------------------------------------------------------|-----------------|
| VAR-2011/23127/1    | 2011 | 4:i:-                          | Poultry | Amplification of the left IS26 element of the inserted transposon |                                                                                 | 3-11-10-NA-0211                                            |                 |
| VAR-2011/22741/1    | 2011 | 4:i:-                          | Pig     |                                                                   |                                                                                 | 3-12-10-NA-0211                                            |                 |
| VAR-2011/17584/1    | 2011 | 4:i:-                          | Pig     |                                                                   |                                                                                 | 3-14-9-NA-0211                                             |                 |
| IPH-08-5402         | 2008 | 4:i:-                          | Pork    |                                                                   |                                                                                 | 3-15-10-NA-0211                                            |                 |
| VAR-2009/08643/1    | 2009 | 4,5:i:-                        | Pig     |                                                                   |                                                                                 | 3-15-7-NA-0211                                             |                 |
| VAR-2008/08748/3    | 2008 | 4:i:-                          | Pig     |                                                                   | TLJ, IS26RJ                                                                     | 3-13-10-NA-0211                                            |                 |
| IPH-08-5323         |      |                                | Pork    |                                                                   |                                                                                 |                                                            |                 |
| VAR-2009/00720/1    | 2009 | 4:i:-                          | Pig     |                                                                   |                                                                                 | 3-13-9-NA-0211                                             |                 |
| VAR-2011/13107/2    | 2011 | 4:i:-                          | Pig     |                                                                   |                                                                                 | 3-14-10-NA-0211                                            |                 |
| VAR-2011/23960/1    | 2011 | 4:i:-                          | Pig     |                                                                   |                                                                                 | TLJ                                                        | 3-12-11-NA-0211 |
| VAR-2011/16678/1    | 2011 | 4:i:-                          | Pig     |                                                                   |                                                                                 |                                                            | 3-13-11-NA-0211 |
| VAR-2010/16453/1    | 2010 | 4:i:-                          | Pig     |                                                                   |                                                                                 | TLJ, TRJ*                                                  | 3-11-10-NA-0211 |
| VAR-2009/08608/1    | 2009 | 4:i:-                          | Pig     |                                                                   |                                                                                 |                                                            | 3-11-11-NA-0211 |
| IPH-1105-2010-00288 | 2010 | 4:i:-                          | Pork    |                                                                   |                                                                                 | IS26LJ, TRJ                                                | 3-13-10-NA-0211 |
| VAR-2008/12224/1    | 2008 | 4:i:-                          | Pig     |                                                                   |                                                                                 |                                                            | 3-14-10-NA-0211 |
| IPH-10-5225         | 2010 | 4,5:i:-                        | Pork    |                                                                   |                                                                                 | IS26LJ                                                     | 3-14-9-NA-0211  |
| VAR-2009/08645/1    | 2009 | 4,5:i:-                        | Pig     |                                                                   |                                                                                 | IS26LJ*, TRJ                                               | 3-14-7-NA-0211  |
| IPH-08-2271         | 2008 | 4,5:i:-                        | Pork    |                                                                   |                                                                                 | Insertion of a single IS26 copy with a deletion            | IS26**          |
| IPH-11-2174         | 2011 | 4,5:i:-                        | Human   | IS26***                                                           |                                                                                 |                                                            | 3-12-7-NA-0211  |
| VAR-2008/14672/1    | 2008 | 4,5:i:-                        | Pig     |                                                                   |                                                                                 |                                                            |                 |
| IPH-08-2445         | 2008 | 4,5:i:-                        | Pork    | No part of Invertible H Segment amplified                         |                                                                                 | IHS*, TRJ                                                  | 3-13-9-NA-0211  |
| IPH-08-2448         |      |                                |         |                                                                   |                                                                                 |                                                            |                 |
| IPH-10-5080         | 2010 | 4,5:i:-                        | Human   |                                                                   |                                                                                 | IHS*, IS26RJ                                               | 3-12-11-NA-0211 |
| IPH-11-3804         | 2011 | 4,5:i:-                        | Human   |                                                                   | IHS*                                                                            | 3-11-12-NA-0211                                            |                 |
| VAR-2011/21815/1    | 2011 | 4,5:i:-                        | Pig     |                                                                   | IHS*, TRJ**                                                                     | 3-12-9-NA-0211                                             |                 |
| VAR-2008/13601/1    | 2008 | 4:i:-                          | Pig     |                                                                   |                                                                                 | 3-12-10-NA-0211                                            |                 |
| VAR-2009/08832/1    | 2009 | 4,5:i:-                        | Pig     |                                                                   | Partial Invertible H Segment containing <i>hixR</i> and a portion of <i>hin</i> | IHS**, TRJ                                                 | 3-12-10-NA-0211 |

| Isolate | Year | Antigenic formula <sup>1</sup> | Origin | Summarized PCR profile | Detailed PCR profile <sup>2</sup> | MLVA profile (STTR9-STTR5-STTR6-STTR10-STTR3) <sup>3</sup> |
|---------|------|--------------------------------|--------|------------------------|-----------------------------------|------------------------------------------------------------|
|---------|------|--------------------------------|--------|------------------------|-----------------------------------|------------------------------------------------------------|

|                  |      |         |         |                                                                                                               |                      |                 |
|------------------|------|---------|---------|---------------------------------------------------------------------------------------------------------------|----------------------|-----------------|
| VAR-2011/13107/1 | 2011 | 4,5:i:- | Pig     | Partial Invertible H Segment containing <i>hixL</i> , the promoter of <i>fljB</i> and a portion of <i>hin</i> | IHS***, TLJ*, IS26RJ | 3-11-9-NA-0211  |
| VAR-2009/09955/2 | 2009 | 4:i:-   | Pig     |                                                                                                               | IHS***, TRJ          | 3-13-9-NA-0211  |
| IPH-11-0277      | 2011 | 4,5:i:- | Pork    | Entire Invertible H Segment                                                                                   | IHS                  | 3-14-10-NA-0311 |
| IPH-11-0690      |      |         | Human   |                                                                                                               |                      |                 |
| VAR-2009/09272/1 | 2009 | 4,5:i:- | Poultry |                                                                                                               |                      |                 |
| VAR-2010/17042/1 | 2010 | 4,5:i:- | Pig     |                                                                                                               |                      |                 |
|                  |      |         |         |                                                                                                               |                      |                 |
|                  |      |         |         |                                                                                                               |                      | 3-17-11-NA-0211 |

<sup>1</sup> O antigens 1 and 12 not assayed in this work. <sup>2</sup> List of the PCR products amplified with the assays described in M&M for each of the 59 STMV *fljB*<sup>+</sup> strain tested. IHS, entire Invertible H Segment; IHS\*, no part of Invertible H Segment amplified; IHS\*\*, partial Invertible H Segment containing just *hixR* and a portion of *hin*; IHS\*\*\*, partial Invertible H Segment containing just *hixL*, the promoter of *fljB* and a portion of *hin*; TLJ, 1-kb Transposon Left Junction; TLJ\*, atypical 0.9kb PCR product; TRJ, 1.2-kb Transposon Right Junction; TRJ\*, atypical 1.3-kb PCR product including a duplicated intergenic *hin-iroB* portion; TRJ\*\*, atypical 1.0 kb PCR product; IS26LJ, 0.6-kb IS26 Left Junction; ; IS26RJ, 0.5-kb IS26 Right Junction; IS26LJ\*, atypical 1-kb PCR product including partial IS26 duplication as determined by sequencing (KJ999733); IS26\*\*, 0.9-kb PCR product corresponding to a single IS26 insertion together with a 536-bp deletion of the *fljB* promoter region as determined by sequencing (KJ999729 and KJ999730); IS26\*\*\*, 1-kb PCR product corresponding to a single IS26 insertion together with a 482-bp deletion of the *fljB* promoter region as determined by sequencing (KJ999731). <sup>3</sup> According to Larsson et al. (Larsson, J. T. et al. 2009. Euro Surveill 14:19174).

Table S2. Primers used to join contigs by PCR reactions and assemble the 83,173-bp chromosome region of *Salmonella* strain VAR-2009/08643/1 covering the *fljBA* operon and the 26-kb transposon.

| Primer pairs                                | Amplicon size |
|---------------------------------------------|---------------|
| BG1239 (5'-CGTATTACCGGCGAGTCGGGTCT-3')      | 1.0kb         |
| BG1234 (5'-TATCACCGTCGGTACTGATCCCGTCA-3')   |               |
| BG1233 (5'-TGATGTGTTCCCAGGGGATAGGAGA-3')    | 1.0kb         |
| BG1217 (5'-TGCACAGATGGCGGACGCAT-3')         |               |
| BG1216 (5'-GCAATCTGTGCGGCCAGT-3')           | 1.0kb         |
| BG1215 (5'-ATACAGGCGTGTGGCATAAATAAACCGA-3') |               |
| BG1259 (5'-CGTGAAATCCCTATAAGGTGCACGGT-3')   | 0.9kb         |
| BG1260 (5'-AGTTCAATATCAAAGCCATGTGCCGTGT-3') |               |
| BG1240 (5'-CGCCGAACATAATCACTGCGGCAT-3')     | 0.9kb         |
| BG1220 (5'-ATTGCCGTGAACGCCCTGACA-3')        |               |
| BG1235 (5'-GCAATGCGTGTGCATCAGTCCCATGA-3')   | 0.6kb         |
| BG1236 (5'-ACCTGACGGTGCTGGAACCCTA-3')       |               |
| BG1261 (5'-TTCTGCCCGTTGATCGCGTCACT-3')      | 1.1kb         |
| BG1262 (5'-TCAATTTGCTGACAATGGCGTTTACCT-3')  |               |
| BG1263 (5'-ACGCGTGCGGCTGAAGTTTACAT-3')      | 1.5kb         |
| BG1264 (5'-AACCTTTGCCAATCAAGCCTCCT-3')      |               |
| BG1232 (5'-TGGCGGGAAATGCGTGTTTACA-3')       | 1.2kb         |
| BG1218 (5'-CAAGGTAACGGGAAACGTAGGGAGT-3')    |               |
